# Supplementary material
Source: publisher figshare collection journal article supplement (https://sage.figshare.com/ndownloader/files/14375816)
Supplement: Supplementary file 1 [file 14375816]

## ONLINE SUPPLEMENT

Supplementary Table I. Summary of mRS outcomes (%) from DEFUSE 3 and DAWN trials.

| Trial    | Intervention group               | mRS 0-2<br>(%) | mRS 3-5<br>(%) | mRS 6<br>(%) |
|----------|----------------------------------|----------------|----------------|--------------|
| DAWN     | Thrombectomy + Medical Treatment | 54             | 16             | 30           |
| 12 hrs   | Medical Treatment alone          | 20             | 48             | 33           |
| DEFUSE 3 | Thrombectomy +Medical Treatment  | 44             | 41             | 14           |
| 16 hrs   | Medical Treatment alone          | 16             | 58             | 26           |
| DAWN     | Thrombectomy + Medical Treatment | 44             | 35             | 21           |
| 24 hrs   | Medical Treatment alone          | 8              | 52             | 40           |

Supplementary Table II. Model parameters and range of values for sensitivity analysis.

|                                                | Base-Case<br>value | Distribution | Range | Alpha-<br>Beta | Source |
|------------------------------------------------|--------------------|--------------|-------|----------------|--------|
| Probabilities from 6 to 12 hours               |                    |              |       |                |        |
| mRS 0-2 after medical therapy and thrombectomy | 0.54               | Dirichlet    | 0-1   | 54-46          | 15     |
| mRS 3-5 after medical therapy and thrombectomy | 0.16               | Dirichlet    | 0-1   | 16-84          | 15     |
| mRS 6 after medical therapy and thrombectomy   | 0.30               | Dirichlet    | 0-1   | 3070           | 15     |
| mRS 0-2 after medical therapy alone            | 0.20               | Dirichlet    | 0-1   | 20-81          | 15     |
| mRS 3-5 after medical therapy alone            | 0.48               | Dirichlet    | 0-1   | 48-53          | 15     |
| mRS 6 after medical therapy alone              | 0.33               | Dirichlet    | 0-1   | 33-68          | 15     |
| If medical therapy alone                       |                    |              |       |                |        |
| mRS 0-2 after recurrent stroke                 | 0.20               | Dirichlet    | 0-1   | 198-802        | Short  |
| mRS 3-5 after recurrent stroke                 | 0.55               | Dirichlet    | 0-1   | 475-525        | term   |
| mRS 6-death after recurrent stroke             | 0.55               | Dirichlet    | 0-1   | 327-673        | model  |
| If endovascular thrombectomy                   |                    |              |       |                |        |
| mRS 0-2 after recurrent stroke                 | 0.54               | Dirichlet    | 0-1   | 540-460        | Short  |
| mRS 3-5 after recurrent stroke                 | 0.16               | Dirichlet    | 0-1   | 160-840        | term   |
| mRS 6-death after recurrent stroke             | 0.30               | Dirichlet    | 0-1   | 300-700        | model  |
| Probabilities from 6 to 16 hours               |                    |              |       |                |        |
| mRS 0-2 after medical therapy and thrombectomy | 0.44               | Dirichlet    | 0-1   | 44-55          | 14     |
| mRS 3-5 after medical therapy and thrombectomy | 0.41               | Dirichlet    | 0-1   | 41-58          | 14     |
| mRS 6 after medical therapy and thrombectomy   | 0.14               | Dirichlet    | 0-1   | 14-85          | 14     |
| mRS 0-2 after medical therapy alone            | 0.16               | Dirichlet    | 0-1   | 16-85          | 14     |
| mRS 3-5 after medical therapy alone            | 0.58               | Dirichlet    | 0-1   | 59-42          | 14     |
| mRS 6 after medical therapy alone              | 0.26               | Dirichlet    | 0-1   | 26-75          | 14     |
| If medical therapy alone                       |                    |              |       |                |        |
| mRS 0-2 after recurrent stroke                 | 0.16               | Dirichlet    | 0-1   | 158-842        | Short  |
| mRS 3-5 after recurrent stroke                 | 0.55               | Dirichlet    | 0-1   | 584-416        | term   |
| mRS 6-death after recurrent stroke             | 0.55               | Dirichlet    | 0-1   | 257-743        | model  |
| If endovascular thrombectomy                   |                    |              |       |                |        |
| mRS 0-2 after recurrent stroke                 | 0.44               | Dirichlet    | 0-1   | 444-556        | Short  |
| mRS 3-5 after recurrent stroke                 | 0.41               | Dirichlet    | 0-1   | 414-586        | term   |
| mRS 6-death after recurrent stroke             | 0.14               | Dirichlet    | 0-1   | 141-859        | model  |
| Probabilities from 6 to 24 hours               |                    |              |       |                |        |
| mRS 0-2 after medical therapy and thrombectomy | 0.44               | Dirichlet    | 0-1   | 44-56          | 15     |
| mRS 3-5 after medical therapy and thrombectomy | 0.35               | Dirichlet    | 0-1   | 35-65          | 15     |
| mRS 6 after medical therapy and thrombectomy   | 0.21               | Dirichlet    | 0-1   | 21-79          | 15     |
| mRS 0-2 after medical therapy alone            | 0.08               | Dirichlet    | 0-1   | 8-93           | 15     |
| mRS 3-5 after medical therapy alone            | 0.52               | Dirichlet    | 0-1   | 53-48          | 15     |
| mRS 6 after medical therapy alone              | 0.40               | Dirichlet    | 0-1   | 40-61          | 15     |
| If medical therapy alone                       |                    |              |       |                |        |
| mRS 0-2 after recurrent stroke                 | 0.08               | Dirichlet    | 0-1   | 79-921         | Short  |
| mRS 3-5 after recurrent stroke                 | 0.55               | Dirichlet    | 0-1   | 525-475        | term   |
| mRS 6-death after recurrent stroke             | 0.55               | Dirichlet    | 0-1   | 396-604        | model  |
| If endovascular thrombectomy                   |                    |              |       |                |        |
| mRS 0-2 after recurrent stroke                 | 0.44               | Dirichlet    | 0-1   | 440-560        | Short  |
| mRS 3-5 after recurrent stroke                 | 0.35               | Dirichlet    | 0-1   | 350-650        | term   |
| mRS 6-death after recurrent stroke             | 0.21               | Dirichlet    | 0-1   | 210-790        | model  |
| (continues)                                    |                    |              |       |                |        |

Supplementary Table II. Model parameters and range of values for sensitivity analysis

(continued).

|                                                         | Base-Case<br>value | Distribution | Range | Alpha-<br>Beta | Source |
|---------------------------------------------------------|--------------------|--------------|-------|----------------|--------|
| Transition probabilities                                |                    |              |       |                |        |
| Movement from up to end of year 1 to 3 months           |                    |              |       |                |        |
| Independent mRS 0-2                                     |                    |              |       |                |        |
| Independent mRS 0-2                                     | 0.955              | Dirichlet    | 0-1   | 1337-63        | 21     |
| Dependent mRS 3-5                                       | 0.024              | Dirichlet    | 0-1   | 34-1366        | 21     |
| Recurrent stroke                                        | 0.013              | Dirichlet    | 0-1   | 18-1382        | 21     |
| Dead mRS 6                                              | 0.008              | Dirichlet    | 0-1   | 11-1389        | 21     |
| Dependent mRS 3-5                                       |                    |              |       |                |        |
| Dependent mRS 3-5                                       | 0.919              | Dirichlet    | 0-1   | 1287-113       | 21     |
| Independent mRS 0-2                                     | 0.029              | Dirichlet    | 0-1   | 41-1359        | 21     |
| Recurrent stroke                                        | 0.013              | Dirichlet    | 0-1   | 18-1382        | 21     |
| Dead mRS 6                                              | 0.039              | Dirichlet    | 0-1   | 55-1345        | 21     |
| Movement from after year 1 to 3 months                  |                    |              |       |                |        |
| Independent mRS 0-2                                     |                    |              |       |                |        |
| Independent mRS 0-2                                     | 0.979              | Dirichlet    | 0-1   | 1371-28        | 21     |
| Dependent mRS 3-5                                       | 0.000              | Dirichlet    | 0-1   | 17-1382        | 21     |
| Recurrent stroke                                        | 0.013              | Dirichlet    | 0-1   | 11-1388        | 21     |
| Dead mRS 6                                              | 0.008              | Dirichlet    | 0-1   | 11-1388        | 21     |
| Dependent mRS 3-5                                       |                    |              |       |                |        |
| Dependent mRS 3-5                                       | 0.948              | Dirichlet    | 0-1   | 1327-72        | 21     |
| Independent mRS 0-2                                     | 0.000              | Dirichlet    | 0-1   | 17-1382        | 21     |
| Recurrent stroke                                        | 0.013              | Dirichlet    | 0-1   | 54-1345        | 21     |
| Dead mRS 6                                              | 0.039              | Dirichlet    | 0-1   | 55-1345        | 21     |
| Recurrent stroke after medical therapy alone            |                    |              |       |                |        |
| Independent mRS 0-2                                     | 0.834              | Dirichlet    | 0-1   | 834-165        | 21-24  |
| Dependent mRS 3-5                                       | 0.137              | Dirichlet    | 0-1   | 136-863        | 21-24  |
| Dead mRS 6                                              | 0.029              | Dirichlet    | 0-1   | 28-971         | 21-24  |
| Recurrent stroke after medical therapy and thrombectomy |                    |              |       |                |        |
| Independent mRS 0-2                                     | 0.867              | Dirichlet    | 0-1   | 867-132        | 21-24  |
| Dependent mRS 3-5                                       | 0.104              | Dirichlet    | 0-1   | 103-896        | 21-24  |
| Dead mRS 6                                              | 0.029              | Dirichlet    | 0-1   | 28-971         | 21-24  |

\*mRS indicates modified Rankin Scale

(continues)

Supplementary Table II. Model parameters and range of values for sensitivity analysis (continued).

|                                      | Base-case<br>value | Univariate SA         | Distribution | Range | Alpha - Beta | Source            |
|--------------------------------------|--------------------|-----------------------|--------------|-------|--------------|-------------------|
| Utilities                            |                    |                       |              |       |              |                   |
| Independent mRS 0-1-2                | 0.185              | 0.1725-0.1925         | Beta         | 0-1   | 684-3021     | 25                |
| Dependent mRS 3-4-5                  | 0.095              | 0.0725-0.1175         | Beta         | 0-1   | 60-590       | 25                |
| Recurrent stroke                     | 0.087              | 0.08-0.090            | Beta         | 0-1   | 540-5685     | 24                |
| Dead mRS 6                           | 0                  |                       |              | 0     |              | 25                |
| Costs                                |                    |                       |              |       |              |                   |
| Medical Therapy                      | \$ 2,346           | \$ 1,578 - \$ 2,997   | Gamma        |       |              | 8,20,21           |
| Mechanical Thrombectomy (16 hrs)     | \$ 8,320           | \$ 7,694 - \$ 14,289  | Gamma        |       |              | 8,20,21           |
| Mechanical Thrombectomy (12 -24 hrs) | \$ 6,339           | \$ 5,824 - \$ 10,816  | Gamma        |       |              | 8,20,21           |
| Acute costs first 3 months           |                    |                       |              |       |              |                   |
| Independent mRS 0-1-2                | \$ 9,006           | \$ 8,156 - \$ 9,849   | Gamma        |       |              | 8,21              |
| Dependent mRS 3-4-5                  | \$ 19,272          | \$ 17,482 - \$ 21,061 | Gamma        |       |              | 8,21              |
| Acute event fatal stroke mRS 6       | \$ 12,380          | \$ 8,666 - \$ 17,919  | Gamma        |       |              | 8,21              |
| Cost of recurrent stroke             | \$ 458             | \$327 - \$474         | Gamma        |       |              | internal<br>model |
| Ongoing costs every 3 months         |                    |                       |              |       |              |                   |
| Independent mRS 0-1-2                | \$ 600             | \$ 430 - \$ 799       | Gamma        |       |              | 8,21              |
| Dependent mRS 3-4-5                  | \$ 1,612           | \$ 1,156 - \$ 2,147   | Gamma        |       |              | 8,21              |

Supplementary Table III. Detailed breakdown costs for Medical Therapy and Mechanical Thrombectomy.

| Cost of Alteplase Treatment                         | Cost (US\$ 2017) |
|-----------------------------------------------------|------------------|
| Cost of drug                                        | <u>738.78</u>    |
| Cost of staff                                       |                  |
| Additional nurse time (5 min)                       | 11.16            |
| Registrar time (190 min)                            | 301.03           |
| Consultant time (50 min)                            | 155.09           |
| Routine observation by senior nurse (5 min)         | 2.12             |
| Additional set of observation x 12 (5 min)          | 186.11           |
| Senior nurse care 1:1 (5 hours)                     | 930.54           |
| Overnight senior nurse care (10 min)                | 9.15             |
| Total cost of administration of Alteplase           | <u>1,595.20</u>  |
| <u>Total cost of Alteplase Treatment</u>            | <u>2,333.97</u>  |
| Cost of Mechanical Therapy                          | Cost (US\$ 2017) |
| Thrombectomy (material) DAWN trial -12, -24 hours   |                  |
| Trevo® stentriever                                  | 4,168.45         |
| Guidecatheter (Flowgate™)                           | 961.95           |
| Guidewire (Transend®)                               | 141.09           |
| Trevo® Pro 18 microcatheter                         | 128.26           |
| Total cost of material                              | <u>5,399.75</u>  |
| Thrombectomy (material) DEFUSE trial - 16 hours     |                  |
| Solitaire™ stentriever                              | 4,867.47         |
| Guidecatheter (Envoy®)                              | 127.20           |
| Guidewire (Traxcess®)                               | 192.39           |
| Microcatheter                                       | 468.15           |
| Carotid Stent                                       | 1,019.67         |
| Aspiration catheter                                 | 705.43           |
| Total cost of material                              | <u>7,380.30</u>  |
| Cost of staff                                       |                  |
| Interventional neuroradiologist                     | 328.03           |
| Radiographer                                        | 86.69            |
| Instrument nurse/scrub nurse                        | 51.55            |
| Circulating nurse                                   | 49.20            |
| Anaesthetist                                        | 328.03           |
| Anaesthetic nurse/ODP                               | 96.07            |
| Total cost staff                                    | <u>939.58</u>    |
| <u>Total cost of Thrombectomy in DAWN trial</u>     | <u>6,339.32</u>  |
| <u>Total cost of Thrombectomy in DEFUSE 3 trial</u> | <u>8,319.88</u>  |

Supplementary Table IV. Probabilistic Sensitivity Analysis: Expected values per 1,000 patients. Costs are based on 2017 prices. The Net Monetary Benefit is calculated at the lower and upper limits of the willingness to pay for a QALY, which in the UK are \$25,600 (£20,000) and \$38,400 (£30,000) respectively.

|                                                                   |                               |                               |                              |
|-------------------------------------------------------------------|-------------------------------|-------------------------------|------------------------------|
| Cost utility of Mechanical Thrombectomy performed within 12 hours |                               |                               |                              |
|                                                                   | Medical Therapy alone         | Mechanical Thrombectomy       | Difference                   |
| Costs                                                             | \$35,375,699                  | \$37,929,541                  | \$2,553,841                  |
| (95% CI)                                                          | (\$32,124,664 - \$38,516,498) | (\$35,203,952 - \$40,553,587) | (-\$1,648,269-\$6,682,749)   |
| QALYs                                                             | 3,065                         | 4,692                         | 1,627                        |
| (95% CI)                                                          | (2,560 – 3,599)               | (3,998-5,363)                 | (760-2,473)                  |
| ICER                                                              |                               |                               | \$1,570                      |
| (95% CI)                                                          |                               |                               | (-\$1,649 - \$3,685)         |
| Net Monetary Benefit                                              |                               |                               |                              |
| <i>Lower</i>                                                      | \$43,258,415                  | \$82,428,773                  |                              |
| <i>Upper</i>                                                      | \$82,575,472                  | \$142,607,931                 |                              |
| Cost utility of Mechanical Thrombectomy performed within 16 hours |                               |                               |                              |
|                                                                   | Medical Therapy alone         | Mechanical Thrombectomy       | Difference                   |
| Costs                                                             | \$40,582,093                  | \$49,435,191                  | \$8,853,098                  |
| (95% CI)                                                          | (\$37,398,484 - \$43,522,487) | (\$46,890,573 - \$51,736,576) | (\$5,103,214 - \$12,711,247) |
| QALYs                                                             | 3,119                         | 4,805                         | 1,686                        |
| (95% CI)                                                          | (2,668-3,592)                 | (4,248-5,352)                 | (952-2,391)                  |
| ICER                                                              |                               |                               | \$5,252                      |
| (95% CI)                                                          |                               |                               | (\$3,094-\$7,954)            |
| Net Monetary Benefit                                              |                               |                               |                              |
| <i>Lower</i>                                                      | \$39,425,686                  | \$73,815,507                  |                              |
| <i>Upper</i>                                                      | \$79,429,575                  | \$135,440,856                 |                              |
| Cost utility of Mechanical Thrombectomy performed within 24 hours |                               |                               |                              |
|                                                                   | Medical Therapy alone         | Mechanical Thrombectomy       | Difference                   |
| Costs                                                             | \$34,363,357                  | \$42,639,941                  | \$8,276,584                  |
| (95% CI)                                                          | (\$30,826,319 - \$37,732,263) | (\$39,861,955-\$45,235,024)   | (\$3,906,006-\$12,689,364)   |
| QALYs                                                             | 2,323                         | 4,557                         | 2,234                        |
| (95% CI)                                                          | (1,914-2,777)                 | (3,950-5,151)                 | (1,494-2,956)                |
| ICER                                                              |                               |                               | \$3,704                      |
| (95% CI)                                                          |                               |                               | (\$2,032-\$5,518)            |
| Net Monetary Benefit                                              |                               |                               |                              |
| <i>Lower</i>                                                      | \$25,222,958                  | \$74,262,957.14               |                              |
| <i>Upper</i>                                                      | \$55,016,116                  | \$132,714,406.50              |                              |
